# Supplementary material for: Response of marine copepods to a changing tropical environment: winners, losers and implications
Source: PeerJ. 2016 May 24;4:e2052. doi: 10.7717/peerj.2052 (PMC4888292; doi:10.7717/peerj.2052)
Supplement: Data S1 [file peerj-04-2052-s001.xlsx]

## Sheet: Sheet1
					A. spinicauda	A. erythraes	Candacia discaudata	Centropages dorsispinatus	C.furcatus	C. tenuiremis	Canthocalanus pauper	Eucalanus subcrassus	Euchaeta concinna	Acrocalanus monachus	Acrocalanus gibber	Bestiolina similis	Paracalanus aculeatus	Parvocalanus crassirostris	Paracalanus sp.	Calanopia thompsoni	Calanopia ellipta	Labiodocera pavo	Labiodocera acuta	Labiodocera banglodeshi	Labiodocera euchaeta	Labidocera kroyeri	Labidocera pectinata	Labidocera jaafari	Labidocera sp1	Pontella penicifeller	Pontella investigatoris	Pontella securifer	Metacalanus aurivilli	Pseudodiaptomus bowmani	Pseudodiaptomus thailandensis	Temora discaudata	Temora turbinata	Tortanus barbatus	Tortanus forcipatus	Lucicutia flavicornis	Lucitica gaussae	Oithona attenuata	Oithona brevicornis	Oithona simplex	Oithona rigida	Oithona plumifera	Oithona dissimilis	Oncaea clevei	Corycaeus pumilis
Time frame	Control-Impact	Month	Station	Code	Aspi	Aery	Cdis	Cdor	Cfur	Ctenu	Capau	Eusub	Econ	Acmon	Acgib	Bsim	Pacu	Pcras	Psp1	Cthom	Celli	Lpav	Lacu	Lben	Leuc	Lkro	Lpec	Ljaa	Lsp1	Ppen i	Pinver	Psecu	Maur	Pbow	Pthai	Tdis	Ttur	Tbar	Tfor	Lfla	Lgau	Oatte	Obre	Osim	Orig	Oplu	Odiss	Ocle	Cpum
Before	C	Jul	C3	10B	347.525	3.9604	0	102.97	5.94059	0	0	122.772	0	0	0	717.822	343.564	4509.9	396.04	1.9802	0	0	0	0	0	0	0	0	0	0	0	0	0	0	0	0	0	0	29.703	0	0	74.2574	0	39.604	0	1.9802	66.3366	0	0
Before	C	Jul	C4	8B	78.4615	234.615	0	0	4.61538	0	0	73.8462	0.0384615	0	123.077	453.077	217.692	3623.08	15.3846	0	0	0	0	0	0	0	0	0	0	0	0	0.153846	0	92.3077	0	0	7.69231	0	0	0	0	215.385	6.92308	0	0	7.69231	86.9231	0	0
Before	C	Jul	C4	8B	158.228	52.7426	0	0	0	0	10.5485	95.9916	0	0	21.097	1069.62	0	4430.91	31.6456	187.236	0	0	0	0	2.67932	0	0	0.168776	0	0.0843882	0	5.27426	0	5.27426	0	0	0	7.91139	76.4768	0	0	52.7426	0	424.051	31.6456	0	0	0	0
Before	C	Aug	C3	10B	74.2983	57.7876	0	2.75179	22.0143	0	33.0215	107.595	0	0	55.0358	136.489	90	1794.17	99.0644	5.50358	0	0	0	5.50358	0	0	0.275179	1	0	0	0	5.33847	0	11.0072	0	0	2.75179	0	52.284	0	0	299.395	13.2086	30.82	20.9136	11.0072	0	9.90644	0
Before	C	Aug	C4	8B	21.7687	74.3764	0.181406	7.25624	12.6984	0	78.0045	386.576	21.9501	0	194.104	212.245	299.32	1133.79	244.898	3.80952	0	0	0	0	0.362812	0	0.181406	0	0	0	0	0	0	14.5125	0	0	0.181406	0	32.6531	0	0	154.125	18.1406	72.5624	18.1406	9.07029	90.7029	81	0
Before	I	Aug	I	21B	29.6912	0	0	12.114	0	0	23.753	294.537	0	0	89.0736	611.639	71.2589	771.971	261.283	304.038	0	0	0	0	41.5677	0	6.4133	0	0	0	0	0	0	124.703	0	0	0	0	65.3207	0	0	142.765	0	59.3824	23.753	0	118.765	24	0
Before	C	Aug	C2	13B	168.109	0	0	0	9.88875	0	158.22	235.698	12.3609	0	255.871	49.4438	401.731	2150.8	0	0	0	0	0	0	0	0	0	0	0	0	0	8.57849	12.3609	4.94438	0	0	0	0	46.9716	0	0	389.37	30.9023	0	18.5414	0	0	86.5266	0
Before	C	Sep	C3	10B	14.8057	0	0	0	0	0	7.40284	62.6774	18.0136	0	62.9241	92.5355	223.627	400.987	100.247	2.34423	0	0	0	1.85071	31.2153	0	3.70142	0	0	0	0	7.89636	7.71129	5.55213	0	0	0	0	17.2733	0	0	154.226	23.1339	0	0	0	0	0	0
Before	C	Sep	C4	8B	42.9415	0	0	5.36769	0	0	32.2061	89.1036	29.4149	0	69.7799	80.5153	365.003	644.122	171.766	53.8916	0	0	0	0	53.8916	0	0	0	0	0	0	27.912	0	37.5738	0	0	0	0	166.398	0	0	107.354	0	64.4122	0	0	0	21.4707	0
Before	I	Sep	I	21B	571.253	0	0	0	0	0	24.57	603.686	0	0	71.9902	358.313	190.418	2063.88	671.581	215.643	0	0	0	0	13.104	0	0	0	0	0	0	1.1466	0	55.2826	6.14251	0	0	0	128.993	0	0	392.98	0	65.5201	0	0	0	0	0
Before	C	Sep	C1	22B	291.515	0	0.208225	0.208225	0	0	15.6169	592.192	0	0	119.729	713.17	359.188	1894.85	229.047	182.405	0	0	0	0	16.4498	0	0.624675	12.077	0	0	0	5.41385	0	62.4675	0	0	10.4112	0	109.318	0	0	395.627	20.8225	478.917	0	0	41.645	0	0
Before	C	Oct	C3	10B	66.9643	0	0.892857	33.7054	0	0	150.67	76.3393	39.8438	0	33.4821	0	915.179	1051.9	66.9643	22.5446	0	0	0	11.1607	139.621	0	0.892857	1	0	0	0	0.446429	0	0	11.1607	0	0	0	16.7411	0	0	142.299	0	44.6429	0	0	0	27.9018	0
Before	C	Oct	C4	8B	134.543	0	0	6.25782	6.25782	0	32.8536	252.378	78.6608	0	92.3029	0	769.712	602.315	101.69	7.82228	0	0	0	3.12891	10.9512	0	14.0801	0	0	0	0	7.07134	0	10.9512	0	0	3.12891	0	0	0	0	273.78	0	31.2891	23.4668	0	0	15.6446	0
Before	I	Oct	I	21B	331.126	0	0	198.675	0	0	7.35835	1149.96	31.4937	0	7.35835	323.767	235.467	2391.46	1118.47	161.884	0	0	0	0	112.73	0	0	0	0	0	0	7.65269	0	22.0751	29.4334	0	0	0	161.884	0	0	191.317	0	463.576	0	0	0	0	0
Before	C	Oct	C2	13B	25.96	0	4.43483	82.2066	0	0	63.8183	284.045	14.927	0	138.453	32.45	962.683	1471.07	16.225	89.9946	0	0	0	0	0	0	4.32666	0	0	0	0	0.108167	0	4.32666	0	0	4.32666	0	80.0433	0	0	248.783	0	10.8167	0	0	0	0	0
Before	C	Oct	C3	10B	34.1103	28.4252	0	5.68505	5.91245	0	85.5031	108.698	153.496	0	147.811	0	767.482	1188.18	51.1654	17.0551	0	0	0	0.227402	5.68505	0	0.227402	0	0	0	0	0	0	0	0	0	0	0	0	0	0	505.969	5.68505	68.2206	0	0	0	0	0
Before	C	Oct	C4	8B	91.9053	49.4875	0	0	74.514	0	67.1615	160.339	79.7455	0	88.3704	21.2089	512.549	657.476	95.4401	10.7458	0	0	0	3.8176	0.141393	0	7.06964	0	0	0	0	10.1803	0	10.6045	0	0.141393	35.3482	0	31.8134	0	0	159.067	0	0	0	0	0	74.2312	0
Before	I	Nov	I	21B	38.7347	0	0	25.8231	0	0	90.3809	320.207	28.9219	0	122.66	167.85	664.945	1988.38	1071.66	0	0	0	0	0	27.1143	0	0	0	0	0	0	0	0	6.45578	0	0	25.8231	0	0	0	0	180.762	0	51.6462	0	0	0	0	0
Before	C	Nov	C1	22B	282.458	4.9554	0	84.44	4.9554	0	4.9554	96.5312	74.7275	0	9.9108	594.648	966.303	6342.91	966.303	30.5253	0	0	0	4.9554	119.128	0	5.35183	0	0	0	0	0.792864	0	123.885	0	0	0	0	243.211	0	0	222.993	0	222.993	0	0	0	0	0
Before	C	Nov	C2	13B	12.5	6.25	0.0625	0	25.0625	0	175	213.375	69	0	450	0	2959.38	2115.62	21.875	18.875	0	0	0	12.5	12.5	0	0.1875	0	0	0	0	0.125	18.75	18.75	0	0.125	0	0	0	0	0	390.625	0	15.625	0	18.75	0	15.625	0
Before	C	Dec	C4	8B	36.6676	27.8674	0	14.6671	0.352009	0	88.0023	403.285	61.6016	17.6005	171.605	41.0678	803.755	1418.3	0	5.86682	7.33353	0	0.234673	22.1179	13.2004	0	0	0	0	0	0	0.469346	0	20.5339	0	0	237.841	0	88.237	0	0	54.2681	0	0	13.2004	0	0	17.6005	0
Before	I	Dec	I	21B	291.693	6.34115	0	0	0	0	95.1173	264.553	31.9594	0	221.94	849.715	3050.1	2460.37	1371.59	76.3475	0	0	0	0	44.8954	0	0	0	0	0	0	0	0	19.0235	0	0	6.34115	0	171.211	0	0	126.823	0	25.3646	0	0	0	0	0
Before	C	Dec	C1	22B	0	0	0	0	0	0	31.6957	615.689	0	0	31.6957	95.0872	0	2503.96	31.6957	47.5436	0	0	0	0	346.276	0	0	0	0	0	0	0	0	15.8479	0	0	15.8479	0	81.6165	0	0	95.0872	95.0872	63.3914	0	0	0	0	0
Before	C	Dec	C2	13B	138.817	0	0	10.2828	0	0	35.9897	120.308	41.1311	0	231.362	1079.69	781.491	2660.67	154.242	144.473	0	0	1	0	144.302	0	0	0	0	0	0	0.17138	0	25.7069	0	0	15.4242	0	143.959	0	0	128.535	0	0	0	0	0	25.7069	0
Before	I	Dec	I	21B	376.748	0	0	0	0	0	51.5085	298.602	248.786	0	14.7167	441.501	272.406	397.351	103.017	15.0846	0	0	0	0	52.1707	0	0	0	0	0	0	33.8484	0	0	0	0	0	0	14.8639	0	0	147.167	14.7167	51.5085	0	0	0	0	0
Before	C	Dec	C1	22B	151.207	62.2618	0	11.69	0	0	11.4358	433.545	12.8335	0	0	562.897	167.726	482.846	1232.53	16.8361	0	0	0	0	3.93901	0	0	1	0	0	0	3.93901	0	35.5781	0	0	16.5184	0	26.6836	0	0	50.8259	0	419.314	0	0	0	0	0
Before	C	Dec	C2	13B	157.134	3.77121	0	0	0	0	16.3419	651.163	16.3419	0	54.0541	138.278	833.438	1047.14	167.19	15.0849	0	0	0	0	15.0849	0	0	0	0	0	0	0	0	3.77121	0	0	12.5707	0	18.8561	0	0	309.239	0	0	0	0	0	0	0
Before	C	Dec	C3	10B	140.98	0	0.238949	7.16846	0	0	57.3477	410.514	40.3823	0	379.928	2102.75	2646.36	4301.08	5482.68	11.2306	0	0	0	0	61.4098	0	0.477897	1	0	0	0	0	0	3.58423	0	0	0	0	43.0108	0	0	215.054	0	430.108	0	0	0	0	0
Before	C	Dec	C4	8B	440.529	0	22.467	11.0132	0	0	132.159	469.383	17.1806	0	126.652	506.608	726.872	4030.84	3325.99	253.744	5.50661	0	0	22.0264	257.269	0	18.0617	0	0.220264	0	0	0	0	49.5595	0	0	0	0	71.5859	0	0	330.396	0	264.317	0	0	0	22.0264	0
Before	I	Jan	I	21B	195.883	0	8.30013	8.30013	0	0	41.5007	323.307	17.3971	0	154.382	0	728.752	584.329	318.725	101.262	0	0	0	0	24.9004	0	0.796813	0	0	0	0	0	0	0	0	0	0	0	58.1009	0	0	79.6813	0	106.242	0	0	0	0	0
Before	C	Jan	C1	22B	235.602	0	10.8202	0	0	0	174.52	557.592	36.6492	0	69.808	523.56	514.834	1221.64	628.272	17.452	0	0	0	0	0	0	0	0	0	0	0	0	0	0	0	0	0	0	8.726	0	0	104.712	0	209.424	0	0	0	0	0
Before	C	Jan	C2	13B	131.168	0	0.062461	0	0	0	12.4922	388.382	20.9244	0	12.4922	312.305	262.336	455.965	274.828	31.2929	0	1	0	0	0	0	0	0	0	0	0	0.062461	0	24.9844	0	0	0	0	6.2461	0	0	74.9532	0	49.9688	0	0	0	0	0
Before	C	Jan	C3	10B	119.128	0.968523	0	20.339	0	0	110.896	182.324	19.1283	0	13.0751	24.2131	246.489	532.688	0	0.484262	0	0	0	12.1065	26.6344	0	4.60048	0	0	0	0	1	0	42.1308	0	0	0	0	28.0872	0	0	242.131	0	72.6392	0	0	0	0	0
Before	C	Jan	C4	8B	116.606	0	1.12585	0	0	0	287.495	50.5026	110.092	20.1045	452.352	0	1381.18	824.286	30.1568	12.0627	6.1922	0	0	0	6.1922	0	6.03136	0	0	0	0	0.160836	0	0	0	0	0	0	24.7688	0	0	271.411	0	60.3136	0	0	0	0	0
Before	I	Feb	I	21B	892.857	0	0	0	0	0	0	314.22	0.0661376	0	6.61376	330.688	39.6825	2807.54	578.704	171.958	0	0	0	0	0.0661376	0	0	1	0	0	0	7.93651	0	13.2275	0	0	13.2275	0	257.937	0	0	62.8307	0	16.5344	0	0	0	0	0
Before	C	Feb	C1	22B	138.801	0	0	25.3628	0	0	18.9274	114.069	22.8391	0	50.4732	492.114	416.404	776.025	2290.22	56.7823	0	0	0	0	38.7382	0	0.126183	0	0	0	0	0.378549	0	201.893	0	0	0	0	114.7	0	0	44.164	0	0	0	0	0	0	0
Before	C	Feb	C2	13B	182.704	6.09013	0	47.3812	0	0	18.2704	15.5907	70.0365	0	21.3155	45.676	1151.04	1184.53	73.0816	21.3155	0	0	0	18.2704	30.6943	0	6.57734	0	0	0	0	10.7186	0	0	0	0	0	0	12.6675	0	0	88.3069	12.1803	24.3605	0	0	0	0	0
Before	C	Feb	C3	10B	410.568	0	0.797607	23.9282	0.398804	0	284.148	196.411	76.1715	0	214.756	0	817.547	1615.15	363.908	9.97009	0	0	0	19.9402	34.2971	0	1.99402	0	0	0	0	0	0	49.8504	0	0	29.9103	9.97009	191.027	0	0	304.088	0	418.744	0	0	0	0	0
Before	C	Feb	C4	8B	77.6926	0	0.170285	10.6428	5.32141	0	37.4202	257.131	40.7833	0	29.7999	0	432.099	453.384	29.7999	5.32141	0	0	0	5.32141	0.170285	0	15.2405	0	0	0	0	6.6837	0	0	0	0	0	0	56.407	0	0	210.728	0	0	0	0	0	0	0
Before	I	Mar	I	21B	275.636	9.84413	0	0	4.92207	0	26.251	114.602	5.82445	0	9.84413	131.255	587.367	1817.06	344.545	16.735	0	0	0	0	0.246103	0	0	1	0	0	0	6.80886	0	132.896	0	0	0	0	36.0952	0	0	205.086	0	0	0	0	0	0	0
Before	C	Mar	C1	22B	546.961	0	0	22.0994	0	0	5.52486	154.917	6.07735	0	93.9227	464.088	1325.97	3580.11	3580.11	22.3204	0	0	0	0	130.608	0	0.220994	1	0	0	0	3.09392	0	248.619	0	0	0	0	72.4862	0	0	265.193	0	132.597	0	0	0	0	0
Before	C	Mar	C2	13B	165.538	0	0	52.6712	7.52445	0	37.6223	108.653	30.0978	0	135.44	331.076	933.032	1324.3	1030.85	7.67494	0	0	0	0	69.0745	0	7.52445	0	0	0	0	0.300978	0	52.6712	0	0	0	7.52445	37.6223	0	0	180.587	30.0978	90.2935	0	0	0	0	0
Before	C	Mar	C3	10B	21.5827	0	0	64.7482	0	0	8.63309	85.7554	4.89209	0	30.2158	258.993	893.525	1165.47	1230.22	21.5827	0	0	0	4.31655	120.288	0	12.9496	0	0	0	0	0	21.5827	310.791	43.1655	0	0	0	17.2662	0	0	172.662	0	453.237	0	0	0	0	0
Before	C	Mar	C4	8B	38.8889	5.55556	0.666667	0	30.5556	0	16.6667	131.667	20.4444	0	83.3333	44.4444	555.556	597.222	238.889	0.444444	0	0	0	0.888889	0	0	0.888889	0	0	0	0	0.222222	0	22.2222	0	0	5.55556	0	16.6667	0	0	216.667	0	19.4444	0	22.2222	0	19.4444	0
Before	C	Apr	C3	10B	140	0	0.266667	33.3333	0	0	160	276.133	164.4	0	73.3333	226.667	1020	1470	180	113.333	0	0	0	0	13.3333	0	0	0	0	0	0	1.06667	156.667	233.333	0	0	26.6667	0	34.4	0	0	70	0	93.3333	0	0	0	20	0
Before	C	Apr	C4	8B	222.222	12.3457	16.6255	164.609	0	0	559.835	519.835	113.086	12.3457	279.835	0	1205.76	1720.16	666.667	66.1728	0	0	0	131.687	111.111	0	0.164609	0	0	0	0	0.493827	0	45.2675	0	0	32.9218	0	0	0	0	333.333	0	49.3827	12.3457	0	0	0	0
Before	I	May	I	21B	551.562	0	0	156.25	0	0	47.6562	187.578	5.46875	0	10.9375	2296.88	177.344	1578.12	1968.75	5.46875	0	0	0	0	0	0	0	0	0	0	0	0	0	5.46875	0	0	0	0	0	0	0	125	0	625	0	0	0	0	0
Before	C	May	C1	22B	416	0	0	137.44	0	0	380	646.72	0	0	157.6	512	4249.6	1024	0	0	0	0	1	0	22.48	0	0	0	0	0	0	0.08	0	86.4	0	0	107.2	0	97.6	0	0	704	0	96	32	0	0	0	0
Before	C	May	C2	13B	1667.13	139.86	0	285.315	5.59441	0	50.3497	598.741	28.1119	0	626.573	279.72	5544.06	4251.75	391.608	0	0	0	0	5.59441	5.59441	0	5.66434	0	0	0	0	0.0699301	0	117.483	0	0	223.776	0	156.643	0	0	503.497	27.972	111.888	27.972	0	0	0	0
Before	I	May	I	21B	1238.64	0	0	36.3636	0	0	0	855	0	0	40.9091	1247.73	327.273	1963.64	538.636	50	0	0	0	0	46	0	0.0909091	0	0	0	0	0	0	40.9091	0	0	29.5455	0	45.4545	0	0	136.364	0	518.182	0	0	0	0	0
Before	C	May	C1	22B	240.602	0	0	54.5113	0	0	0	356.692	0.150376	0	0	293.233	270.677	721.805	1781.95	0	0	0	0	0	250.677	0	9.84962	0	0	0	0	0	112.782	411.805	0	0	22.5564	0	0	0	0	22.5564	0	135.338	0	0	0	0	0
Before	C	May	C2	13B	518.135	20.7254	0	365.803	15.544	0	31.0881	462.953	8.03109	0	7.77202	373.057	816.062	2279.79	419.689	59.5855	0	0	0	15.544	297.28	0	7.77202	0	0	0	0	8.03109	93.2642	409.326	0	0	54.4041	0	146.373	0	0	352.332	25.9067	284.974	0	0	0	0	0
Before	C	May	C3	10B	269.565	0	0	160.957	34.7826	0	139.13	455.13	236.087	0	347.826	34.7826	3086.96	713.043	130.435	0	0	0	0	17.6522	34.7826	0	26.5217	0	0	0	0	17.913	0	34.7826	0	0	226.087	0	0	17.3913	0	469.565	34.7826	26.087	0	17.3913	0	0	0
Before	C	May	C4	8B	468.75	0	4.63235	74.3382	32.3529	0	119.559	430.551	88.1985	0	114.89	0	1415.44	514.706	0	9.19118	0	0	0	4.74265	4.59559	0	4.88971	0	0	0	0	0.0735294	0	13.7868	0	0	18.3824	0	4.59559	0	0	113.971	18.3824	7.35294	44.1176	9.19118	0	0	0
Before	C	May	C3	10B	29.1667	0	44.0833	31.5833	43.75	0	37.5	58.1667	31.5	0	62.5	0	22.9167	0	0	0.5	0	0	0	6.25	6.25	0	6.25	0	0	0	0	0.333333	0	22.9167	0	0	18.75	0	18.9167	0	6.25	0	0	8.33333	0	0	0	0	0
Before	C	May	C4	8B	3.80435	0.163043	20.3804	3.91304	3.8587	0	19.5652	557.283	90.8152	3.80435	43.4783	48.913	485.87	271.739	0	0	0	0	0	0	0.163043	0	0.217391	0	0	0	0	0.271739	4	19.0217	0	0	226.63	0	3.80435	0	40.2174	29.8913	0	65.2174	0	125	0	65.2174	3.80435
Before	I	Jun	I	21B	333.969	49.2366	0.229008	56.1832	33.2061	0	10.687	44.5038	0.229008	0	289.695	154.58	795.42	1923.66	320.229	55.7252	0	0	0	0	5.34351	0	21.374	1	0	0	0	1.60305	22.9008	101.908	0	0	5.34351	0	238.244	0	0	148.855	22.9008	22.9008	17.1756	0	0	0	0
Before	C	Jun	C1	22B	224.923	0	0	303.692	7.69231	0	15.3846	52.3077	34.4615	0	338.462	92.3077	1000	2238.46	646.154	32.6154	0	0	0	0	63.0769	0	8.92308	0	0	0	0	1.53846	69.2308	292.308	0	0	123.077	0	171.077	0	0	92.3077	23.0769	161.538	0	0	0	0	0
Before	C	Jun	C2	13B	581.633	20.4082	0	368.435	0	0	30.6122	217.959	82.9932	0	193.878	183.673	857.143	2176.87	142.857	20.4082	0	0	0	0	61.7687	0	20.4082	0	0	0	0	20.4082	20.4082	448.98	0	0	40.8163	0	204.082	0	0	183.673	27.2109	108.844	0	0	0	0	0
Before	C	Jun	C3	10B	378.788	21.2121	0.0757576	69.7727	16.2879	0	77.3485	141.364	45.6818	0	121.212	431.818	1746.97	4318.18	931.818	5.5303	0	0	0	0	11.5909	0	5.75758	0	0	0	0	0.0757576	0	580.303	0	0	15.9091	5.30303	15.9091	0	0	227.273	22.7273	318.182	90.9091	5.30303	0	22.7273	0
Before	C	Jun	C4	8B	132.442	0	0.0460829	26.5438	22.765	0	38.7097	16.2673	12.765	0	126.728	0	1602.76	1188.94	101.382	0.691244	0	0	0	0	6.54378	0	0.506912	0	0	0	0	0	0	118.018	0	0	21.659	0	6.86636	0	0	184.332	18.4332	276.498	9.21659	0	0	0	0
Before	I	Jul	I	21B	1645.83	0	0	75.1667	0.0833333	0	0	124.75	50	0	60.4167	200	275	1575	650	10.6667	0	0	0	0	56.25	0	0.166667	0	0	0	0	1.91667	0	172.917	0	0	0	0	364.583	0	0	125	0	50	0	0	25	0	0
Before	C	Jul	C1	22B	823.529	0	0	980.915	0	0	0	110.719	0	0	9.80392	352.941	0	1869.28	1633.99	49.281	0	0	0	0	20.3922	0	11.3725	0	0	0	0	0.784314	0	333.333	303.922	0	39.2157	0	59.085	0	0	26.1438	0	1071.9	0	0	104.575	0	0
Before	C	Jul	C2	13B	739.496	42.0168	0	184.874	58.8235	0	92.437	481.765	75.6303	0	151.261	352.941	226.891	2621.85	529.412	67.3109	0	0	0	0	33.6975	0	25.2941	0	0	0	0	0.168067	25.2101	252.101	0	0	8.40336	0	126.05	0	0	176.471	25.2101	100.84	0	0	0	0	0
Before	C	Jul	C3	10B	52.0231	0	0	98.7283	5.78035	0	11.5607	265.665	13.6416	0	57.8035	23.1214	676.301	3479.77	138.728	25.4335	0	0	1	0	122.312	0	18.4971	0	0	0	0	0.231214	52.0231	86.7052	0	0	0	0	17.341	0	0	387.283	57.8035	751.445	23.1214	0	0	0	0
Before	C	Jul	C4	8B	49.1803	0	0	29.5082	14.3443	0	4.09836	330.328	8.19672	0	0	100.41	516	682.377	1594.26	0.409836	0	0	0	0.409836	300.82	0	2.86885	0	0	0	0	0.409836	0	28.6885	0	0	14.3443	0	0	0	0	114.754	16.3934	147.541	0	0	0	0	0
Before	I	Aug	I	21B	339.677	0	0	12.7419	0	0	36.2903	57.0968	0.322581	0	32.2581	673.387	141.129	2596.77	209.677	24.5161	0	0	0	24.1935	24.1935	0	33.5484	1	12.0968	0	0	0.322581	0	375	0	0	12.0968	0	12.4194	0	0	108.871	0	96.7742	0	0	0	0	0
Before	C	Aug	C1	22B	487.037	0	0	9.85185	0	0	18.5185	342.667	1.18519	0	9.25926	666.667	251.852	2177.78	1214.81	1.18519	0	0	0	0	167.704	0	30.4444	0	0	0	0	1.48148	74.0741	185.185	325.926	0	0	9.25926	0	0	0	400	177.778	296.296	0	0	0	0	0
Before	C	Aug	C2	13B	393.889	0	0	19.0123	10.1235	0	145.062	691.914	0.37037	0	126.543	1209.88	478.395	5185.19	148.148	47.1605	0	0	0	0.123457	0	0	39.9383	0	0	0	0	0	24.6914	228.519	0	0	52.4691	0	299.383	0	0	962.963	98.7654	320.988	0	0	0	25	0
Before	I	Sep	I	21B	357.143	8.92857	0	0	0	0	8.92857	189.464	0.357143	0	205.357	964.286	1419.64	4500	1607.14	412.321	0	0	0	0	36.4286	0	0	1	17.8571	0	0	0.892857	0	62.5	35.7143	0	0	0	330.357	0	0	250	71.4286	928.571	0	0	0	35.7143	0
Before	C	Sep	C1	22B	895.652	26.087	0	0.173913	0	0	108.87	289.217	44.1739	0	339.13	913.043	908.696	6956.52	1347.83	187.304	0	0	0	0	28	0	0.173913	1	0	0	0	0	0	78.2609	13.0435	0	43.4783	0.173913	300	0	0	391.304	0	347.826	86.9565	0	0	0	0
Before	C	Sep	C2	13B	93.9655	16.3793	0.0431034	3.87931	47.1552	0	76.7241	48.1466	0	0	21.5517	2.15517	16.8103	23.7069	0	0	0	0	0	0.0431034	3.92241	0	7.75862	4.61207	0	0	0	0.431034	0	12.931	0	0	3.87931	0	27.7586	0	0	6.46552	2.15517	2.15517	0	0	0	0	0
Before	I	Oct	I	21B	446.602	67.9612	0	48.5437	29.1262	0	106.796	797.573	184.466	0	97.0874	87.3786	300.971	1165.05	0	9.70874	0	0	0	19.4175	29.1262	0	0	0	0	0	0	0.38835	0	126.214	0	0	0	9.70874	407.767	0	0	582.524	0	310.68	0	0	0	0	0
Before	C	Oct	C2	13B	33.3333	8.33333	0.166667	0	0.333333	0	141.833	756.667	142.5	0	133.333	0	458.333	1200	233.333	8.33333	0	0	0	0.166667	0.166667	0	0	0	0	0	0	0.166667	33.3333	33.5	0	0	0	0	33.5	0	0	300	0	0	0	0	0	0	0
Before	C	Oct	C3	10B	672	0	0	137.6	0	0	28	442	16	0	28	220	428	1670	530	32.4	0	0	0	0	293.6	0	0.8	0	0	0	0	0	0	148	0	0	0	8	156	0	0	150	8	90	0	0	0	0	0
Before	C	Oct	C4	8B	28.9017	5.78035	0	40.4624	5.78035	0	40.4624	148.671	10.1734	0	63.5838	34.6821	398.844	1369.94	52.0231	0	0	0	0	0	5.78035	0	5.78035	0	0	0	0	0.231214	0	0	0	0	0	5.78035	29.1329	0	0	208.092	0	34.6821	0	0	0	0	0
After	I	Aug	I	21	34.8635	0	0	0	0	0	0	412.783	17.4317	0	0	197.56	2.32423	682.162	521.79	0	0	0	0	0	0	0	0	1	0	0	0	0.116212	52.2952	2.32423	0	0	0	0	51.1331	0	0	98.7798	0	958.745	0	0	23.2423	0	0
After	I	Aug	I	21	21.4987	0	0	112.4	0	35.6824	0	766.459	0	0	0	142.73	0	642.284	321.142	0	0	0	0	0	5.35236	0	0	0	0	0	0	0	107.047	35.6824	0	0	0	0	0.0892061	0	0	107.047	0	1998.22	0	0	0	35.6824	0
After	C	Aug	C1	22	2.38521	0	0	0	0	0	0	429.517	262.373	0	0	23.8521	2.38521	572.451	59.6303	0	0	0	0	0	0	0	0	1	0	0	0	4.83005	0	4.77042	0	0	0	0	64.4007	0	0	395.945	0	1454.98	0	0	0	0	0
After	C	Aug	C1	22	40.9226	0	0	29.7619	0	29.7619	29.7619	826.19	327.381	0	37.2024	416.667	119.048	1398.81	535.714	0	0	0	0	0	212.054	0	0	0	0	0	0	0.0744048	148.81	66.9643	0	0	0	0	44.6429	0	0	238.095	89.2857	1190.48	0	0	0	0	0
After	C	Aug	C2	13	4.50958	2.25479	2.25479	4.50958	236.753	0.0563698	50.7328	710.372	913.191	0	0	33.8219	0	16.9109	0	0	0	0	0	6.76437	0	0	0	0	0	0	0	0	0	0	0	0	16.9109	0	75.5355	0	0	304.397	0	16.9109	0	0	0	34	0
After	C	Aug	C2	13	6.28437	72.2702	0	3.14218	62.8437	0	0	694.423	0	0	9.42655	94.2655	0	125.687	0	0	0	0	0	12.6473	0	0	0	0	0	0	0	0.0785546	0	37.7062	0	0	0	3.14218	97.4077	0	0	188.531	125.687	62.8437	0	0	0	0	0
After	C	Aug	C3	10	0.249011	0.124505	11.3338	0.249011	46.2591	0.00311263	13.845	207.42	172.015	0	0	1.86758	0	45.1083	0	0	0	0	1	0.428734	0	0	0	0	0	0	0	0	0	0	0	0	0.93379	0	4.22615	0	0	60.9827	276.091	0.93379	0	0	0	46	0
After	C	Aug	C3	10	6.45342	17.2278	0.392817	2.24467	1.17845	16.835	161.785	251.74	252.525	0	19.4725	0	218.855	151.515	0	0	0	0	0	10.5499	0	0	0.392817	0	0	0	0	0	0	0.392817	0	0	17.6207	0	0.392817	0	0	67.3401	117.845	0	0	0.392817	16.835	67.3401	0
After	I	Sep	I	21	27.8279	0	0	0	0	0	0	0	203.93	0	0	76.4737	234	382.369	21	0	0	0	0	0.31864	0	0	0	0	0	0	0	0	0	4.24854	0	0	67.9766	0	0.15932	0	0	16.9942	0	3186.4	0	0	0	0	0
After	I	Sep	I	21	31.8723	0	0	0	0	0	0	0	531.205	0	0	374.988	600	1091	9.52835	0	0	0	0	0	0	0	0	0	0.666984	0	0	0	0	0	0	0	471.653	0	0.333492	0	0	92.9014	0	10624.1	0	0	0	0	0
After	C	Sep	C1	22	4.45718	11.4613	0	262.974	20.8851	0	7.00414	143.012	2037.57	0	78.319	128.621	2880	2088.51	1222.54	0	0	0	0	52.7221	3.1837	0	2.67431	0	0	0	0	8.91436	0	29.29	0	0	0	3.1837	28.2713	0	0	1401.46	0	11461.3	0	0	916.905	51	0
After	C	Sep	C1	22	4.68596	1.97304	0	214.814	12.3315	0	23.7586	92.7327	223.611	0	30.2532	0	690	2486.02	2038.8	0	0	0	0	14.3045	0	0	0.246629	0	0	0	0	2	0	41.4337	0	0	0	0.493259	95.9388	0	0	1078.59	0	9773.1	0	0	65.7678	53	0
After	C	Sep	C2	13	61.1855	0	0	238.623	2.80433	0	28.4257	557.68	51.8802	0	12.747	0	1405.23	4053.54	1427.66	0	0	0	0	16.9535	21.0325	0	0.12747	0	0	0	0	0	0	135.5	0	0	0	0.764818	23.5819	0	0	1300.19	0	5634.16	0	0	790.312	0	0
After	C	Sep	C2	13	34.2786	0	0	199.657	0	0	24.9299	562.013	281.022	0	24.9299	0	962.917	1620.44	810.221	0	0	0	0	31.1935	46.7747	0	0	0	0	0	0.0311624	0	0	81.0221	0	0	0	0	87.2546	0	0	448.738	0	3066.38	0	0	62.3247	0	0
After	C	Sep	C3	10	24.2775	19.2678	0	5.20231	2.56904	0	7.28966	1067.18	250.514	0	38.5356	0	252.89	2909.44	597	0	0	0	0	0.192678	0.0642261	0	0.032113	0	0	0	0	0	0	2.40848	0	0	0	0.032113	5.00963	0	0	2678.23	0	443.16	0	0	1119.94	0	0
After	C	Sep	C3	10	5.26811	0.125431	0	4.29602	52.4302	0	1974.91	56.6008	125.588	0	1.12888	0	627.407	3185.95	4565.69	0	0	0	0	7.68266	0.250862	0	0	0	0	0	0	0	0	0.125431	0	0	0.125431	0	56.3186	0	0	2207.59	0	1153.97	0	0	150.517	0	0
After	C	Sep	C4	8	26.4739	0	0.957567	1.31431	2.77882	0	35.0169	194.762	460.477	0	54.0368	0	2951	187.758	337.965	0	0	0	1	34.3597	0	0	0	0	0	0	0	0	0	0	0	0	0	0	1.31431	0	0	705.971	0	82.6136	0	0	22.531	90	0
After	C	Sep	C4	8	3.07338	0	1.84403	0	9.22013	0	6.14675	100.96	129.543	0	130.619	0	2712.26	207.453	622.359	0	0	0	0	3.07338	0	0	0	0	0	0	0	0	0	0	0	0	30.7338	0	0	0	0	991.164	0	107.568	0	0	23.0503	8	0
After	I	Oct	I	21	30.1415	0	0	0	0	0	0	245.708	0	0	9.62264	127.406	66.0377	320.802	103.868	0.0471698	0	0	0	0	0	0	0	0	0	0	0	0	0	0	0	0	0	0	0.0471698	0	0	1042.45	47.1698	570.755	0	0	28.3019	9	0
After	I	Oct	I	21	0.0942063	0.0471032	0	0	0	0	14.178	28.2619	0	0	42.487	70.6547	0	155.44	0	0	0	0	0	0.0471032	0	0	0	0	0	0	0	0	0	0	0	0	0	0	28.2619	0	0	28.2619	0	127.179	0	0	0	0	0
After	C	Oct	C1	22	8.33681	0	0	0	0	0	2.0842	1286.29	104.21	0	4.1684	100.042	4.1684	967.07	10.421	0	0	0	0	0	6.25261	0	0.333472	1	0	0	0	0	66.6945	2.0842	0	0	0	0	0	0	0	200.083	0	1067.11	0	0	0	0	0
After	C	Oct	C1	22	125.354	0	4.04367	8.08734	0	0	0	747.594	0	0	8.08734	250.708	20.2184	735.948	331.581	0	4.04367	0	0	0	0.323494	0	4.04367	0	0	0	0	0	0	4.04367	0	0	0	0	0	0	0	214.315	0	582.289	0	0	388.192	0	0
After	C	Oct	C2	13	83.4824	11.9261	0	23.8521	0	0.119261	23.8521	1050.27	0.0596303	0	35.7782	2480.62	441.264	2134.76	703.637	0.0596303	0	0	0	0	119.38	0	0.0596303	0	0	0	0	0	0	11.9261	0	0	0	0	59.6303	0	0	1955.87	0	4293.38	0	0	155.039	0	0
After	C	Oct	C2	13	461.402	8.87311	0.0887311	88.8199	0.0887311	0	17.7462	1052.71	8.96185	0	26.6193	1872.23	79.858	4853.59	1730.26	0.0887311	0	0	0	0	98.2254	0	0.532387	0	0	0	0	0	0	17.835	0	0	283.94	0.443656	0	0	0	851.819	283.94	4543.03	0	0	0	0	0
After	C	Oct	C3	10	27.972	13.986	0.559441	42.7972	0.559441	0.27972	293.706	544.336	14.2657	0	797.203	237.762	1846.15	3440.56	41.958	0	0	0	0	0.27972	13.986	0	0.839161	0	0	0	0	0	0	0	0	0	181.818	0	13.986	0	0	1944.06	111.888	755.245	0	0	111.888	0	0
After	C	Oct	C3	10	230.969	0	0.260247	11.0605	0.260247	0	1691.61	1201.43	0	0	1441.12	227.716	1532.21	2914.77	0	9.75927	0	0	0	19.5185	9.75927	0	0.260247	0	0	0	0	0	0	0	0	0	58.8159	9.75927	19.5185	0	0	738.452	133.377	1249.19	0	9.75927	113.858	0	0
After	C	Oct	C4	8	63.3245	0	0	83.1135	0	0	109.499	769.182	63.3245	0	672.823	1329.82	833.773	5910.29	4375.99	0	0	0	0	0	126.649	0	46.1741	0	0	0	0	0	0	0	0	0	9.23483	0	18.4697	0	0	1287.6	126.649	18729.6	0	0	0	0	0
After	C	Oct	C4	8	1.24224	0	0	81.7805	0	0	206.211	304.762	1.24224	0	205.59	1128.16	1134.99	3578.26	8085.92	0	0	0	0	0	280.538	0	3.10559	0	0	0	0	0	0	0.621118	0	0	132.505	0	2.48447	0	0	1457.56	0	13124.8	0	0	0	0	0
After	I	Nov	I	21	52.0231	0	0	0	0	0.0481696	0	260.356	0	0	2.89017	125.241	19.2678	568.401	48.1696	19.2678	0	0	0	0	0	0	2.93834	0	0	0	0	0	0	0	0	0	0	0	0	0	0	67.4374	0	10086.7	0	0	115.607	0	0
After	I	Nov	I	21	6.19195	0	0	0	0	0	0	203.173	0	0	0	135.449	38.6997	532.121	377.322	0	0	0	0	0	0	0	0	0	0	0	0	0	0	0	0	0	0	0	0	0	0	183.824	0	3066.95	0	0	0	0	0
After	C	Nov	C1	22	15.1609	0	0	0.620396	11.9426	4.84684	119.232	1204.38	95.8511	0	109.539	0.310198	593.253	271.423	1613.03	0	0	0	0	0.310198	57.3478	0	0.310198	0	0	0	0	0	0	23.2648	0	0	15.8201	0	0.310198	0	0	748.352	0	3644.82	0	0	0	0	0
After	C	Nov	C1	22	34.3786	0	0	12.8489	0.152964	0.152964	15.4493	307.648	30.631	0	11.6252	20.0765	46.8451	153.92	622.371	3.82409	0	0	0	0.305927	22.6386	0	0.305927	0	0	0	0	0	0	3.82409	0	0	1.91205	0	4.78011	0	0	562.141	19.1205	2145.32	0	0	0	0.956023	0
After	C	Nov	C2	13	161.29	0	2.31739	15.2948	0.926956	0	113.552	1610.59	292.455	0	181.683	0	747.126	148.313	185.391	1.39043	0	0	0	6.48869	18.5391	0	13.9043	0	0	0	0	0	0	18.5391	0	0	42.64	0	17.6122	0	0	778.643	79.7182	389.321	0	0	0	0	0
After	C	Nov	C2	13	87.5274	0	1.75055	28.884	0	70.0219	113.786	2364.11	59.5186	0	245.077	105.033	595.186	420.131	35.0109	0	0	0	0	0	0	0	0	0	0	0	0	0	0	43.7637	0	0	17.5055	0	78.7746	0	0	1015.32	70.0219	980.306	0	70.0219	0	0	0
After	C	Nov	C3	10	75.4761	0	0.696702	40.1765	2.78681	0.696702	174.176	859.498	281.235	0	46.4468	0	777.984	371.575	209.011	5.80585	0	0	0	12.3084	0.696702	0	0	0	0	0	0	0	0	0	0	0	0	0	12.3084	0	0	975.383	98.6995	185.787	0	0	0	0	0
After	C	Nov	C3	10	9.40734	0	0	80.9031	0.940734	23.5183	144.873	1077.14	71.4958	0	174.036	37.6294	799.624	225.776	192.85	0	0	0	0	1.88147	37.6294	0	0.940734	0	0	0	0	0	0	0	0	0	0	0	9.40734	0	0	917.215	0	202.258	0	0	0	0	0
After	C	Nov	C4	8	11.3225	0	0.566123	5.66123	5.66123	0	28.8723	370.811	45.2899	0	39.6286	45.2899	560.462	144.928	416.667	33.9674	0	0	0	0	0	0	0	0	0	0	0	0	0	0	0	0	0	0	6.22736	0	0	22.6449	0	45.2899	0	0	0	0	0
After	C	Nov	C4	8	18.1726	0	2.01918	1.00959	7.57193	0	22.7158	668.349	109.541	0	94.3968	40.3836	716.81	479.556	585.563	0	0	0	0	0	48.9652	0	0	0	0	0	0	0	0	0	0	0	7.57193	0	3.02877	0	0	1039.88	0	2897.53	0	0	0	0	0
After	I	Dec	I	21	293.769	0	0	2.96736	0	0	0	18.5955	0	0	0	3877.35	158.259	6567.75	27220.6	0	0	0	0	0	79.1296	0	0	0	0	0	0	0	0	26.7062	0	0	0	0	0	0	0	158.259	0	11473.8	0	0	0	0	0
After	I	Dec	I	21	404.547	0	0	40.9668	0	0	0	89.5125	0	0	0	3031.54	0	7251.13	27365.8	0	0	0	0	0	0	0	0	0	0	0	0	0	0	51.2085	0	0	0	0	0	0	0	81.9336	0	13560	0	0	0	0	0
After	I	Dec	I	21	33.8507	0	0	0	0	0	0.0838926	344.841	0	0	8.38926	520.176	109.186	75.5034	7676.26	0	0	0	0	0	95.0923	0	0	0	0	0	0	0	0	17.6174	0	0	0	0	0	0	0	864.094	0	2046.98	0	0	0	0	0
After	I	Dec	I	21	114.739	0	0	0	0	47.5746	5.59701	486.007	0	0	0	349.813	132.463	466.418	6444.03	0	0	0	0	0	23.3209	0	0	0	0	0	0	0	0	2.79851	0	0	0	0	3.73134	0	0	606.343	0	2145.52	0	0	0	0	0
After	C	Dec	C1	22	40.201	0	0	0	18.2732	0.365464	88.0767	530.288	122.065	0	80.402	249.429	782.092	260.393	2536.32	0	0	0	0	0.182732	87.894	0	0.182732	0	0	0	0	0	0	3.65464	0	0	7.30927	0	3.83737	0	0	1553.22	76.7474	1174.05	0	0	0	0	0
After	C	Dec	C1	22	55.751	0	0.180424	0	45.2864	49.8872	227.515	678.124	5.14208	0	80.018	387.461	1178.62	541.272	2056.38	0.180424	0	0	0	0	12.9003	0	0	0	0	0	0	0	0	26.6125	0	0	0	0	4.05954	0	0	2142.53	45.106	1240.41	0	0	0	0	0
After	C	Dec	C2	13	64.8558	0.167154	0.167154	22.733	16.8826	31.9265	171.835	611.952	105.641	0	425.073	203.928	1748.43	768.909	635.186	3.51024	0	0	0	0	100.961	0	0.334308	0	0	0	0	0	0	14.041	0	0	20.2257	0.167154	0.167154	0	0	2791.48	16.7154	250.731	0	0	16.7154	0.167154	0
After	C	Dec	C2	13	58.8824	75.2294	0.166806	6.83903	0.166806	26.8557	205.671	490.575	17.8482	0	388.324	83.4028	2114.26	583.82	237.698	0.166806	0	0	0	0	159.133	0	0.333611	0	0	0	0	0	0	42.3686	0	0	8.50709	0.166806	0.166806	0	0	3286.07	70.8924	383.653	0	0	0	0.166806	0
After	C	Dec	C3	10	14.5793	0.310198	0.620396	26.5995	22.1016	22.8771	243.117	248.081	181.698	0	351.842	31.0198	2146.1	201.629	170.609	0	0	0	0	0	5.81621	0	0	0	0	0	0	0	0	0.155099	0	0	15.5099	0	0.310198	0	0	1682.82	36.836	189.996	0	0	0	0	0
After	C	Dec	C3	10	68.4986	12.9032	0.477897	51.2943	32.497	80.446	331.501	211.39	139.068	0	380.088	0	2543.85	350.458	305.058	0	3.18598	0	0	0	3.50458	0	0	0	0	0	0	3	0	6.84986	0	0	63.7196	0	0.318598	0	0	1604.94	31.8598	99.5619	0	0	0	0	0
After	C	Dec	C4	8	24.2779	0	0.334868	27.7941	20.427	15.2365	97.6141	289.828	91.2516	0	234.743	50.2302	1283.05	456.258	757.639	0	0	0	0	0.167434	0	0	0	0	0	0	0	0	0	0	0	0	0	0	0.167434	0	0	1481.79	29.301	0	0	0	0	0	0
After	C	Dec	C4	8	44.6375	0	0.534581	30.7384	0	7.35048	174.808	214.1	140.728	0	200.468	53.4581	1123.15	534.581	133.645	0	0	0	0	0	5.47945	0	0.133645	0	0	0	0	0	0	0	0	0	0	0	26.8627	0	0	1309.72	0	240.561	0	2.6729	0	0	0
After	I	Feb	I	21	99.3228	0	0	0	0	0	30.0978	34.6125	0	0	0	487.585	129.421	3702.03	826.185	0	0	0	0	0	0	0	0	0	0	0	0	0	0	27.088	0	0	0	0	0	0	0	270.88	0	10052.7	0	0	0	0	0
After	I	Feb	I	21	322.292	0	0	0	0	17.9051	0	161.146	0	0	0	590.868	179.051	2041.18	465.533	0	0	0	0	0	0	0	0	0	0	0	0	0	0	0	0	0	0	0	17.9051	0	0	465.533	0	9704.57	0	0	0	0	0
After	I	Feb	I	21	163.595	8.58615	0	68.6892	77.2753	86.3194	8.58615	35.7184	0	0	8.58615	214.654	532.341	412.135	123.068	0	0	0	0	0	8.58615	0	8.81511	0	0	0	0	0	0	8.58615	0	0	0	0	51.5169	0	0	658.271	0	1285.06	0	0	0	0	0
After	I	Feb	I	21	239.383	0	0	0	0	56.2208	0	370.814	0	0	0	28.0636	519.177	551.918	449.018	0	0	0	0	0.0935454	0	0	42.6567	0	0	0	0	0	0	14.1254	0	0	0	0	276.146	0	0	1131.99	0	289.991	0	0	0	0	0
After	C	Feb	C1	22	71.6388	0	0	7.81329	109.082	184.678	7.61035	334.348	38.2547	0	71.0299	202.943	413.496	618.975	1669.2	0	0	0	0	7.81329	1.82648	0	1.62354	0	0	0	0	0	0	106.545	0	0	7.61035	0.202943	71.3343	0	0	753.425	0	3094.88	0	0	0	0	0
After	C	Feb	C1	22	7.35294	0	0	14.7059	0	405.882	0	458.824	0	0	138.235	542.647	395.588	705.882	2930.88	0	0	0	0	0	2.94118	0	10.2941	0	0	0	0	0	0	105.882	0	0	0	0	194.118	0	0	1682.35	0	4558.82	0	0	0	0	0
After	C	Feb	C2	13	0	0	8.15927	50.5875	26.1097	226.828	179.504	321.475	163.185	0	73.4334	78.329	1006.85	1122.72	783.29	0	0	0	0	0	0	0	0	0	0	0	0	0	0	225.196	0	0	112.598	0	76.6971	0	0	966.057	0	1906.01	0	0	0	0	0
After	C	Feb	C2	13	21.8887	0	25.0156	71.9199	0	193.871	59.4121	90.6817	25.0156	0	209.506	75.0469	1353.97	625.391	262.664	0	0	0	0	12.5078	62.5391	0	37.5235	0	250.156	0	0	0	0	234.522	0	0	21.8887	12.5078	171.982	0	0	1035.02	0	1938.71	0	0	0	0	0
After	C	Feb	C3	10	19.6271	0	0	444.063	0	174.19	53.9745	364.328	239.205	0	83.4151	103.042	1242.64	652.601	510.304	0	0	0	0	0	141.07	0	0	0	0	0	0	0	24.5339	157.017	0	0	29.4406	0	169.284	0	0	780.177	0	1246.32	0	0	0	0	0
After	C	Feb	C3	10	63.6307	3.74298	0	548.971	0	390.518	37.4298	560.2	18.7149	0	101.061	561.447	2197.13	511.541	524.017	0	0	0	0	0	152.215	0	0	0	0	0	0	1.24766	1.24766	215.845	0	0	63.6307	1.24766	204.616	0	0	1049.28	24.9532	2470.37	0	0	0	0	0
After	C	Feb	C4	8	50.5051	0	0	161.616	0	131.313	80.8081	151.515	179.798	0	131.313	60.6061	2020.2	686.869	40.404	0	0	0	0	0	24.2424	0	2.0202	0	0	0	0	0	0	101.01	0	0	40.404	0	50.5051	0	0	1232.32	30.303	686.869	0	0	0	0	0
After	C	Feb	C4	8	20.4886	15.7604	23.6407	70.922	0	133.964	161.545	157.604	102.443	0	279.748	59.1017	1627.27	527.975	133.964	0	0	0	0	0	0	0	1.57604	0	0	0	0	0	0	98.5028	0	0	74.8621	0	55.1615	0	0	1631.21	15.7604	937.746	0	0	31.5209	0	0
After	I	Mar	I	21	169.414	0	0	0	0	0.0993049	0	6.0576	158.888	0	0	1769.61	0	1847.07	238.332	0	0	0	0	0	0	0	0	1	0	0	0	0.0993049	0	5.95829	0	0	59.5829	0	17.8749	0	0	516.385	59.5829	2005.96	0	0	0	0	0
After	I	Mar	I	21	311.048	0	0	0.113895	0	0	0	28.5877	14.2369	0	150.911	2018.79	99.6583	2257.97	1207.29	0	0	0	0	0	0	0	0.113895	0	0	0	0	0	0	42.8246	0	0	0	0	14.2369	0	0	697.608	136.674	4581.44	0	0	0	0	0
After	I	Mar	I	21	43.4783	0	0	76.6087	0	80.6087	10.8696	103.304	35.1304	0	10.8696	402.174	521.739	2156.52	380.435	0.173913	0	0	0	0	0	0	10.8696	0	0	0	0	0	0	0	0	0	34.7826	0	78.2609	0	0	1204.35	0	1819.57	0	0	0	0	0
After	I	Mar	I	21	99.1007	0	0.0899281	36.241	0	18.0755	8.99281	192.896	0.0899281	0	53.9568	278.777	719.424	2365.11	899.281	0.0899281	0	0	0	0	8.99281	0	0.44964	0	0	0	0	0	0	0	0	0	0	0	35.9712	0	0	1654.68	8.99281	1079.14	0	0	0	0	0
After	C	Mar	C1	22	45.2941	0	0.294118	21.0294	0	1.76471	9.48529	581.912	4.70588	0	137.206	722.426	456.691	2126.84	823.529	0	0	0	0	0	1.17647	0	9.48529	0	0	0	0	0	0	10.6618	0	0	9.19118	0	83.8971	0	0	1713.24	117.647	882.353	0	0	0	0	0
After	C	Mar	C1	22	36.5762	0	0	47.8952	0	88.0262	0	45.1824	12.0674	0	23.3863	645.463	636.109	1545.84	1010.29	0	0	0	0	0	0	0	0	0	0	0	0	0	0	12.0674	0	0	0	0	46.7727	0	0	1779.7	0	4925.16	0	0	0	0	0
After	C	Mar	C2	13	841.749	0	0	249.175	0	65.5116	12.3762	338.944	126.733	0	334.818	420.792	2400.99	693.069	594.059	12.3762	0	0	0	0	13.0363	0	0.330033	0	0	0	0	0	198.02	75.5776	0	0	0	12.3762	38.4488	0	0	2784.65	210.396	915.842	0	0	0	0	0
After	C	Mar	C2	13	127.66	0	0	12.5205	0	73.5679	20.7856	450	24.3863	0	354.255	131.26	2770.05	891.98	20.4583	0.327332	0	0	0	0	63.0115	0	0.327332	0	0	0	0	0	10.2291	31.3421	0	0	20.4583	0.327332	51.8003	0	0	3944.35	0	1470.95	0	0	0	0	0
After	C	Mar	C3	10	264.192	0.436681	0	190.393	0.436681	93.8865	0	811.354	264.192	0	174.672	174.672	786.463	1222.71	87.3362	0	0	0	0	0	0	0	0.873362	0	0	0	0	0	0	0.436681	0	0	0	0	88.2096	0	0	2969.43	0	1222.71	0	0	0	0	0
After	C	Mar	C3	10	97.4801	1.98939	0	29.8408	0	417.772	0.994695	222.48	160.146	0	159.151	79.5756	1996.35	583.554	0	0	0	0	0	0.994695	0.994695	0	0	0	0	0	0	0	0	0.994695	0	0	0	0	1.98939	0	0	3899.2	0	1167.11	0	0	0	0	0
After	C	Mar	C4	8	331.067	0	0	157.351	1.25881	96.9285	181.269	623.112	5.03525	0	10.0705	161.128	956.697	825.78	30.2115	0	0	0	0	2.51762	0	0	0	0	0	0	0	0	0	0	0	0	10.0705	0	11.3293	0	0	1480.36	261.833	503.525	0	0	0	0	0
After	C	Mar	C4	8	19.4731	0.91638	137.915	134.021	0.91638	71.0195	120.733	283.849	53.8373	0	189.003	51.5464	1099.66	1191.29	0	0	0	0	0	1.37457	0.45819	0	35.2806	0	0	0	0	0	0	0	0	0	171.821	0	155.097	0	0	1151.2	274.914	412.371	0	0	0	0	0
After	I	Apr	I	21	688.381	11.5238	0	0.0952381	0	12.5714	0	126.381	0	0	22.9524	1910.48	72.4762	3238.1	304.762	0	0	0	0	0	0	0	0.0952381	0	0	0	0	0.0952381	38.0952	38.0952	5.71429	0	0	0	0	0	0	609.524	0	3047.62	0	0	0	0	0
After	I	Apr	I	21	300.784	0	0	481.881	5.87659	35.5534	0	103.82	0	0	11.7532	1402.55	487.757	4995.1	195.886	0	0	0	0	0	0	0	0	0	0	0	0	0	0	0	117.532	0	0	0	117.532	0	0	587.659	0	1665.03	0	0	0	0	0
After	I	Apr	I	21	69.3901	0	0	183.542	0	120.602	6.25489	370.602	19.3511	0	184.519	4528.54	1681.78	11989.8	3393.28	6.25489	0	0	0	0	76.8178	0	12.5098	0	0	0	0	0	35.1837	353.401	6.25489	0	12.5098	0	18.7647	0	0	996.873	0	10023.5	0	0	0	0	0
After	I	Apr	I	21	41.6048	0	0	186.924	0	256.761	0	137.89	13.6701	0	0	2621.1	1515.6	11248.1	2243.68	0	0	0	0	0	36.2556	0	0.297177	0	0	0	0	0	44.5765	190.193	0	0	0	0	0	0	0	802.377	0	6924.22	0	0	0	0	0
After	C	Apr	C1	22	87.5439	0	35.0877	584.561	0	24.7368	15.7895	67.5439	3.15789	0	31.5789	3767.54	804.386	7263.16	2313.16	0.350877	0	0	0	0	48.7719	0	8.24561	1	0	0	0	0	105.263	393.86	7.89474	0	35.0877	0	31.9298	0	0	105.263	70.1754	6456.14	0	0	0	0	0
After	C	Apr	C1	22	36.96	7.2	0	1340.48	0.32	40.8	21.6	78.56	7.68	0	452.48	6641.12	1567.2	14487.2	3536	0.64	0	0	0	0	103.2	0	8.8	1	0	0	0	0	0	441.28	254.4	0	7.2	0	22.56	0	0	256	0	19920	0	0	0	0	0
After	C	Apr	C2	13	436.46	799.069	0	2095.81	1.99601	137.725	266.8	552.894	82.5017	27	26.6134	961.411	479.042	7022.62	116.434	0	0	0	0	1.33067	0.665336	0	27.2788	0	0	0	0	0	0	413.174	0	0	107.119	13.3067	97.8044	0	0	464.072	194.611	108.117	0	0	66.5336	13.3067	0
After	C	Apr	C2	13	390.086	276.509	0	2147.84	71.9828	348.276	519.397	233.836	20.9052	0	149.569	1415.95	443.319	5323.28	21.5517	0	0	0	0	0	101.509	0	22.4138	0	0	0	0	1.50862	0	322.629	0	0	273.707	0	22.4138	0	0	170.259	10.7759	353.448	0	10.7759	0	0	0
After	C	Apr	C3	10	2.61011	18.2708	685.155	174.225	25.4486	190.212	16.6395	273.083	100.489	0	482.545	457.096	4195.11	4249.59	81.5661	0	0	0	0	0.978793	68.1892	0	16.3132	0	0	0	0	0	57.4225	41.4356	0	0	603.589	0	126.591	0	0	2324.63	0	187.602	0	0	65	0	0
After	C	Apr	C3	10	254.773	93.7556	0	380.821	13.4701	438.359	115.968	162.801	40.2319	0	263.247	950.045	2462.53	4968.78	214.095	0	0	0	0	0.0892061	53.8805	1	13.3809	0	0	0	0	0	0	13.3809	0	0	115.968	0	41.124	0	0	1204.28	89.2953	218.555	0	0.0892061	0	0	0
After	C	Apr	C4	8	242.593	298.148	0	533.333	57.4074	125.926	164.815	320.37	298.148	0	361.111	918.519	2255.56	1614.81	0	0	0	0	0	11.1111	131.481	0	22.2222	0	0	0	0	0	29.6296	40.7407	0	0	183.333	0	11.1111	0	0	612.963	296.296	168.519	25.9259	66.6667	0	88.8889	0
After	C	Apr	C4	8	54.0641	109.993	0	193.885	54.0641	89.4855	65.2498	193.885	7.45712	0	82.0283	563.013	768.084	1424.31	18.6428	0	0	0	0	1.86428	20.5071	0	0	0	0	0	0	0	0	46.607	0	0	130.5	0	9.3214	0	0	29.8285	59.657	0	0	33.557	0	67.1141	0
[truncated: 16 more columns]
